# Supplementary material
Source: PubMed Central journal article supplement (PMC7964981)
Supplement: 2128_tables_figures.pdf [file 2128_tables_figures.pdf]

**On-line Table 1. VBM results for volumes of GM and WM in 15 patients with HD ( $P < .05$  FDR corrected)**

|                 | Cluster<br>Size (mm <sup>3</sup> ) | Voxel    |                              | Coordinates<br>(Local Maxima) |     |    | Areas                                                               |
|-----------------|------------------------------------|----------|------------------------------|-------------------------------|-----|----|---------------------------------------------------------------------|
|                 |                                    | <i>T</i> | <i>P</i> <sub>FDR-corr</sub> | X                             | Y   | Z  |                                                                     |
| GM: Controls>HD | 66,659                             | 8.67     | .000                         | 14                            | 7   | 4  | R and L caudate, putamen, thalamus, insula, temporal superior gyrus |
|                 | 7924                               | 6.25     | .000                         | 39                            | -21 | 54 | R precentral and postcentral gyri                                   |
|                 | 5571                               | 5.21     | .001                         | 19                            | -64 | 27 | R and L calcarine gyri, R cuneus and precuneus                      |
|                 | 2534                               | 6.92     | .000                         | 5                             | 27  | 16 | R and L anterior and middle cingulum                                |
|                 | 2492                               | 4.28     | .004                         | -35                           | -85 | 10 | L middle and superior occipital gyri                                |
|                 | 2431                               | 4.90     | .001                         | 47                            | -68 | 8  | R middle temporal and middle occipital gyri                         |
|                 | 2239                               | 4.90     | .001                         | 29                            | -78 | 24 | R middle and superior occipital gyri                                |
|                 | 1693                               | 4.71     | .002                         | -15                           | -66 | 30 | L calcarine gyrus, L cuneus and precuneus                           |
|                 | 1171                               | 4.51     | .003                         | -41                           | -17 | 43 | L precentral and postcentral gyri                                   |
|                 | WM: Controls>HD                    | 1054     | 5.86                         | .010                          | 12  | 5  | -1                                                                  |
| 963             |                                    | 5.18     | .010                         | 37                            | 4   | 16 | R frontal subcortical WM                                            |
| 881             |                                    | 5.65     | .010                         | -13                           | 1   | -1 | L internal capsule of genu                                          |
| 671             |                                    | 4.83     | .014                         | -22                           | -20 | 23 | L corticospinal tract (corona radiata)                              |
| 359             |                                    | 5.31     | .010                         | 23                            | -53 | 16 | R splenium of corpus callosum                                       |
| 108             |                                    | 5.20     | .010                         | -37                           | 6   | 12 | L frontal subcortical WM                                            |

**On-line Table 2: VBM results showing the significant ( $P < .05$  FDR corrected) correlation between individual scores of motor deficit and cognitive tests and the areas of GM and WM losses in 15 HD gene carriers**

|                                     | Cluster Size (mm <sup>3</sup> ) | Voxel |                       | Coordinates (Local Maxima) |     |     | Areas                                                                                                                                                                                                                                                                               |
|-------------------------------------|---------------------------------|-------|-----------------------|----------------------------|-----|-----|-------------------------------------------------------------------------------------------------------------------------------------------------------------------------------------------------------------------------------------------------------------------------------------|
|                                     |                                 | T     | P <sub>FDR-corr</sub> | X                          | Y   | Z   |                                                                                                                                                                                                                                                                                     |
| <b>GM</b>                           |                                 |       |                       |                            |     |     |                                                                                                                                                                                                                                                                                     |
| Motor Scale                         | 7451                            | 9.69  | .007                  | 3                          | -15 | 4   | R thalamus, putamen, caudate, and insula gyrus; L thalamus and caudate                                                                                                                                                                                                              |
| Symbol Digit test                   | 16626                           | 10.35 | .004                  | 33                         | 3   | 9   | R putamen and insula, rolandic operculum, inferior operculum frontal, inferior triangularis frontal, inferior orbital frontal, superior temporal, and Heschl gyri                                                                                                                   |
|                                     | 8820                            | 8.78  | .004                  | 18                         | 1   | 16  | R thalamus, caudate, amygdala, olfactory and medial orbital frontal gyri; L thalamus, caudate, olfactory, and anterior cingulum gyri                                                                                                                                                |
|                                     | 10080                           | 8.51  | .004                  | -34                        | 3   | 12  | L insula, rolandic operculum, inferior operculum frontal, Heschl, superior temporal gyri, and L putamen and pallidum                                                                                                                                                                |
|                                     | 2385                            | 8.29  | .004                  | -14                        | -27 | -13 | L hippocampus, parahippocampal and lingual gyri; L cerebellar hemisphere 4-5                                                                                                                                                                                                        |
|                                     | 2145                            | 7.43  | .005                  | 53                         | -23 | 38  | R postcentral, precentral, and supramarginal gyri                                                                                                                                                                                                                                   |
|                                     | 1150                            | 7.05  | .005                  | 19                         | -26 | -11 | R hippocampus, parahippocampal, lingual, precuneus, and posterior cingulum gyri                                                                                                                                                                                                     |
| Stroop Color-Word Interference Test | 3319                            | 9.45  | .010                  | -35                        | 38  | 18  | L middle frontal, inferior triangularis frontal, and superior frontal gyri                                                                                                                                                                                                          |
|                                     | 14241                           | 9.37  | .010                  | 37                         | 4   | 13  | R insula, rolandic operculum, inferior operculum frontal, Heschl, and superior temporal gyri; R putamen                                                                                                                                                                             |
|                                     | 1292                            | 9.00  | .010                  | 44                         | -16 | 36  | R postcentral and precentral gyri                                                                                                                                                                                                                                                   |
|                                     | 11583                           | 8.58  | .010                  | -44                        | -14 | 11  | L insula, rolandic operculum, inferior triangularis frontal, superior temporal, Heschl gyri; L putamen                                                                                                                                                                              |
|                                     | 2885                            | 8.28  | .010                  | -7                         | -3  | 4   | R caudate and thalamus; L caudate and thalamus                                                                                                                                                                                                                                      |
|                                     | 3181                            | 6.57  | .010                  | 12                         | -48 | -27 | R lingual gyrus; R cerebellar hemisphere 3-6; vermis 4-8                                                                                                                                                                                                                            |
|                                     | 1209                            | 6.10  | .010                  | -1                         | 23  | -7  | R anterior cingulum, olfactory and medial orbital frontal gyri; L anterior cingulum and olfactory gyri                                                                                                                                                                              |
| Verbal Fluency test                 | 29848                           | 17.21 | .000                  | -29                        | -16 | 4   | L insula, middle frontal, rolandic operculum, inferior triangularis frontal, inferior operculum frontal, precentral, superior temporal, and Heschl gyri; L putamen and pallidum                                                                                                     |
|                                     | 45420                           | 13.89 | .000                  | 50                         | -6  | 4   | R insula, rolandic operculum, anterior cingulum, inferior operculum frontal, inferior triangularis frontal, medial orbital frontal, olfactory, superior temporal, and Heschl gyri; R putamen and caudate; L anterior cingulum, olfactory and medial orbital frontal gyri; L caudate |
|                                     | 4248                            | 13.26 | .000                  | 53                         | -24 | 39  | R postcentral, precentral, and supramarginal gyri                                                                                                                                                                                                                                   |
|                                     | 3251                            | 13.23 | .000                  | -10                        | -32 | -13 | L hippocampus, parahippocampal, lingual, and fusiform gyri; L cerebellar hemisphere 4-5                                                                                                                                                                                             |
| <b>WM</b>                           |                                 |       |                       |                            |     |     |                                                                                                                                                                                                                                                                                     |
| Motor Scale                         | 7185                            | 9.40  | .009                  | 1                          | -15 | -7  | L superior corona radiata, corticospinal tract, and brain stem                                                                                                                                                                                                                      |
|                                     | 3070                            | 8.02  | .009                  | 20                         | -15 | 21  | R superior corona radiata, corticospinal tract, inferior fronto-occipital fasciculus                                                                                                                                                                                                |
|                                     | 1401                            | 6.00  | .011                  | 12                         | -21 | -43 | Brain stem                                                                                                                                                                                                                                                                          |
| Symbol Digit test                   | 1102                            | 4.79  | .023                  | 13                         | 33  | 0   | R inferior fronto-occipital fasciculus and genu of corpus callosum                                                                                                                                                                                                                  |
|                                     | 48865                           | 9.70  | .020                  | -40                        | 27  | 27  | L and R frontal subcortical WM, corticospinal tract, genu of corpus callosum, forceps minor, cingulum                                                                                                                                                                               |
|                                     | 3626                            | 5.83  | .020                  | -44                        | -17 | -22 | L inferior and superior longitudinal fasciculi (temporal part)                                                                                                                                                                                                                      |
|                                     | 2667                            | 4.84  | .020                  | 13                         | -53 | -46 | R middle cerebellar peduncle and R cerebellar WM                                                                                                                                                                                                                                    |
|                                     | 1205                            | 4.32  | .023                  | -13                        | -45 | -44 | Inferior brain stem and L inferior and middle cerebellar peduncles, L cerebellar WM                                                                                                                                                                                                 |
| Stroop Color-Word Interference test | 18940                           | 9.48  | .014                  | 40                         | 13  | 15  | R frontal subcortical WM, corticospinal tract, genu of corpus callosum, superior longitudinal fasciculus (temporal part)                                                                                                                                                            |
|                                     | 16744                           | 6.97  | .018                  | -31                        | 35  | 4   | L frontal subcortical WM, corticospinal tract, superior longitudinal fasciculus (temporal part)                                                                                                                                                                                     |
|                                     | 11724                           | 5.75  | .023                  | -16                        | -57 | -29 | L superior longitudinal fasciculus (temporal part), L middle cerebellar peduncles and L cerebellar WM                                                                                                                                                                               |
|                                     | 11657                           | 5.35  | .023                  | 22                         | -47 | -27 | R middle cerebellar peduncles and cerebellar WM                                                                                                                                                                                                                                     |
| Verbal Fluency test                 | 48865                           | 9.70  | .020                  | -40                        | 27  | 27  | L and R frontal subcortical WM, corticospinal tract, genu of corpus callosum                                                                                                                                                                                                        |
|                                     | 3626                            | 5.83  | .020                  | -44                        | -17 | -22 | L inferior and superior longitudinal fasciculi                                                                                                                                                                                                                                      |
|                                     | 2667                            | 4.84  | .020                  | 13                         | -53 | -46 | Inferior brain stem and L inferior and middle cerebellar peduncles, L cerebellar WM                                                                                                                                                                                                 |
|                                     | 1205                            | 4.32  | .023                  | -13                        | -45 | -44 | R middle cerebellar peduncles and cerebellar WM                                                                                                                                                                                                                                     |

**On-line Table 3. TBSS results: areas of increased MD in 15 patients with HD versus 15 healthy controls<sup>a</sup>**

| Cluster size<br>(mm <sup>3</sup> ) | P    | Coordinates (Local Maxima) |     |     | Areas                                                                                                                          |
|------------------------------------|------|----------------------------|-----|-----|--------------------------------------------------------------------------------------------------------------------------------|
|                                    |      | X                          | Y   | Z   |                                                                                                                                |
| 12016                              | .000 | 44                         | -9  | -30 | R superior and inferior longitudinal fasciculi, inferior fronto-occipital fasciculus, external capsule and corticospinal tract |
| 9283                               | .000 | -37                        | -6  | -27 | L superior and inferior longitudinal fasciculi, inferior fronto-occipital fasciculus, external capsule and corticospinal tract |
| 692                                | .003 | -4                         | 6   | -10 | Fornix                                                                                                                         |
| 601                                | .003 | 51                         | -40 | -14 | R inferior longitudinal fasciculi and inferior fronto-occipital fasciculi                                                      |
| 355                                | .006 | 15                         | 14  | 28  | R corona radiata                                                                                                               |
| 331                                | .006 | -11                        | -14 | -16 | L corticospinal tract (cerebral peduncle)                                                                                      |
| 316                                | .006 | 37                         | -43 | -15 | R inferior longitudinal fasciculus                                                                                             |
| 290                                | .006 | -29                        | -31 | 35  | L subcortical frontoparietal WM                                                                                                |
| 207                                | .010 | 14                         | -32 | 2   | Fornix (crus)                                                                                                                  |
| 177                                | .011 | 35                         | 2   | 32  | R subcortical frontal WM                                                                                                       |
| 148                                | .013 | -11                        | 6   | 2   | L anterior limb of internal capsule and anterior thalamic radiation                                                            |
| 142                                | .013 | 15                         | -53 | 24  | R subcortical parietal WM                                                                                                      |
| 138                                | .014 | 23                         | -84 | 6   | R inferior longitudinal fasciculus                                                                                             |
| 128                                | .015 | -11                        | -58 | 24  | L subcortical parietal WM                                                                                                      |
| 120                                | .016 | 27                         | -86 | 12  | R inferior longitudinal fasciculus                                                                                             |
| 94                                 | .023 | 28                         | -24 | -1  | R corticospinal tract (retrolenticular part of internal capsule)                                                               |
| 92                                 | .023 | 28                         | -26 | 38  | R corticospinal tract (corona radiata)                                                                                         |
| 90                                 | .023 | 16                         | -8  | 52  | R corona radiata                                                                                                               |
| 85                                 | .024 | -50                        | -35 | -16 | L subcortical temporal WM                                                                                                      |
| 78                                 | .026 | 20                         | -25 | 48  | R corticospinal tract (corona radiata)                                                                                         |
| 75                                 | .027 | -16                        | -75 | 15  | L subcortical occipital WM                                                                                                     |
| 69                                 | .029 | 21                         | 52  | 0   | R forceps minor                                                                                                                |
| 63                                 | .033 | 5                          | -24 | -10 | R anterior thalamic radiation                                                                                                  |
| 61                                 | .035 | 14                         | -80 | 17  | R subcortical occipital WM                                                                                                     |
| 58                                 | .036 | 13                         | 12  | -4  | R anterior limb of internal capsule                                                                                            |
| 56                                 | .038 | 37                         | -27 | 47  | R corticospinal tract                                                                                                          |
| 54                                 | .039 | 52                         | -6  | 19  | R subcortical frontal WM                                                                                                       |
| 53                                 | .040 | 16                         | -65 | -2  | R subcortical occipital WM                                                                                                     |
| 50                                 | .042 | -26                        | -22 | 8   | L corticospinal tract (retrolenticular part of internal capsule)                                                               |
| 49                                 | .043 | -37                        | -42 | -16 | L inferior longitudinal fasciculus                                                                                             |
| 48                                 | .043 | -4                         | -25 | -8  | L anterior thalamic radiation                                                                                                  |
| 45                                 | .045 | -27                        | -69 | 19  | L subcortical parietal WM                                                                                                      |
| 45                                 | .045 | 24                         | -87 | -2  | R subcortical occipital WM                                                                                                     |

<sup>a</sup> MD: HD>controls.**On-line Table 4. TBSS results: correlation between decreased FA and Motor Scale score in 15 patients with HD**

| Cluster Size<br>(mm <sup>3</sup> ) | P    | Coordinates (Local Maxima) |     |     | Areas                                                                      |
|------------------------------------|------|----------------------------|-----|-----|----------------------------------------------------------------------------|
|                                    |      | X                          | Y   | Z   |                                                                            |
| 5306                               | .001 | -34                        | -57 | -3  | Corpus callosum, forceps major, and L inferior fronto-occipital fasciculus |
| 1161                               | .017 | -16                        | 32  | -18 | L inferior fronto-occipital fasciculus and forceps minor                   |
| 1061                               | .020 | 36                         | -60 | -3  | Corpus callosum, forceps major, and R inferior fronto-occipital fasciculus |

**On-line Table 5. TBSS results: correlation between decreased FA and Stroop Color-Word Interference test score in 15 patients with HD**

| Cluster Size<br>(mm <sup>3</sup> ) | P    | Coordinates (Local Maxima) |    |     | Areas                                                    |
|------------------------------------|------|----------------------------|----|-----|----------------------------------------------------------|
|                                    |      | X                          | Y  | Z   |                                                          |
| 1287                               | .011 | -16                        | 31 | -16 | L inferior fronto-occipital fasciculus and forceps minor |
| 1107                               | .015 | 5                          | 26 | 8   | Genu and body of corpus callosum                         |
| 899                                | .022 | 17                         | 29 | -16 | R inferior fronto-occipital fasciculus and forceps minor |

**On-line Table 6. TBSS results: correlation between decreased FA and Symbol Digit test score in 15 patients with HD**

| Cluster Size<br>(mm <sup>3</sup> ) | P    | Coordinates (Local Maxima) |     |     | Areas                                                                              |
|------------------------------------|------|----------------------------|-----|-----|------------------------------------------------------------------------------------|
|                                    |      | X                          | Y   | Z   |                                                                                    |
| 4767                               | .003 | -12                        | 40  | -17 | Corpus callosum, R corona radiata, and L and R inferior fronto-occipital fasciculi |
| 652                                | .047 | -31                        | -69 | 1   | L inferior fronto-occipital fasciculus and forceps major                           |

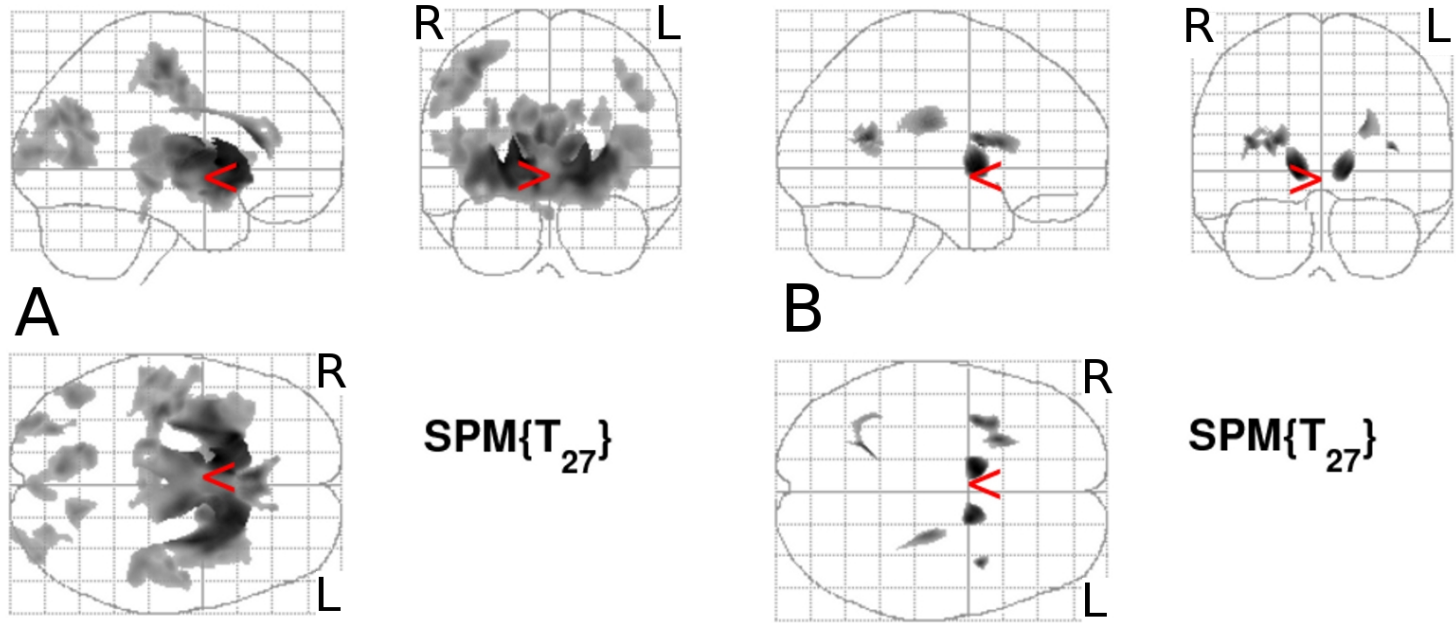

**Supplementary Figure 1 (A-D):** VBM analysis in HD gene carriers vs healthy controls. Maps of the t-value (voxel analysis at  $p < 0.05$  corrected for multiple comparisons) represented as glass brain (A,B) showing areas of GM (A) and WM (B) losses in HD gene carriers as compared to healthy controls. See Supplementary Table 1 for details.

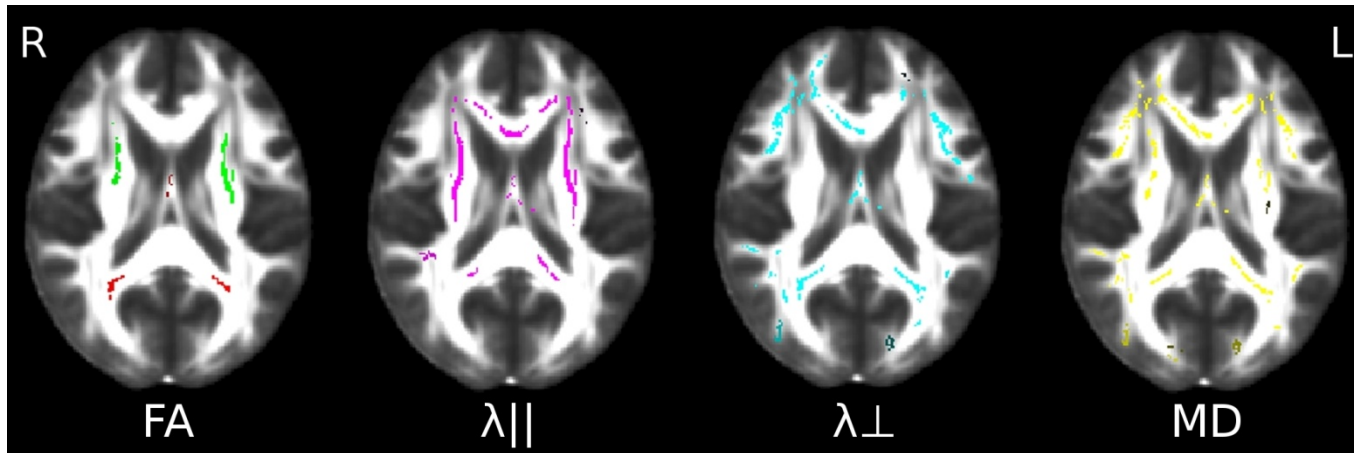

**Supplementary Figure 2:** TBSS analysis of FA,  $\lambda_{||}$ ,  $\lambda_{\perp}$  and MD maps in HD gene carriers vs healthy controls. Maps of the t-value ( $t > 3$  with  $p < 0.05$  corrected for multiple comparisons) at a mid-ventricular level showing in red the areas of significantly decreased FA in the lateral portions of the posterior corpus callosum and anterior fornix and in green the areas of significantly increased FA in the supralenticular frontal WM comprising the corticospinal tracts, anterior thalamic radiations and superior fronto-occipital fasciculus. A corresponding increase of the greatest eigenvalue is shown in pink by  $\lambda_{||}$  map, while the  $\lambda_{\perp}$  map shows its increase in sky blue only in the areas of decreased FA and elsewhere. The map of MD shows in yellow the areas of increased MD which are widespread and corresponds to those of altered FA and beyond.

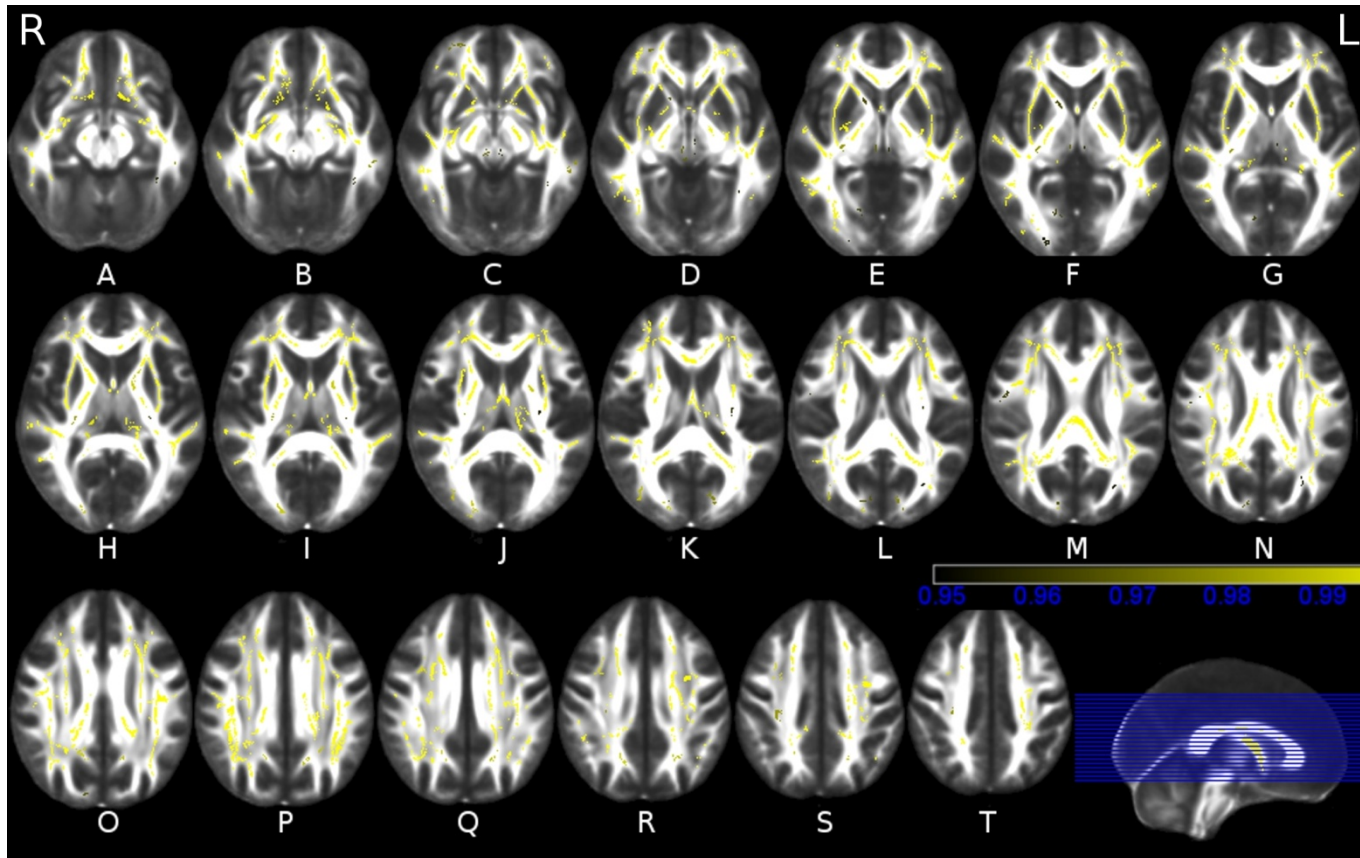

**Supplementary Figure 3 (A-T):** TBSS analysis of MD maps. Maps of the t-value ( $t > 3$  with  $p < 0.05$  corrected for multiple comparisons) showing in yellow the areas of significantly increased in WM in HD gene carriers as compared to controls. These include multiple association tracts and the corpus callosum. Note the involvement of arciform fibres and of the cerebral peduncles (B,C) (colour bar indicates 1-p values).

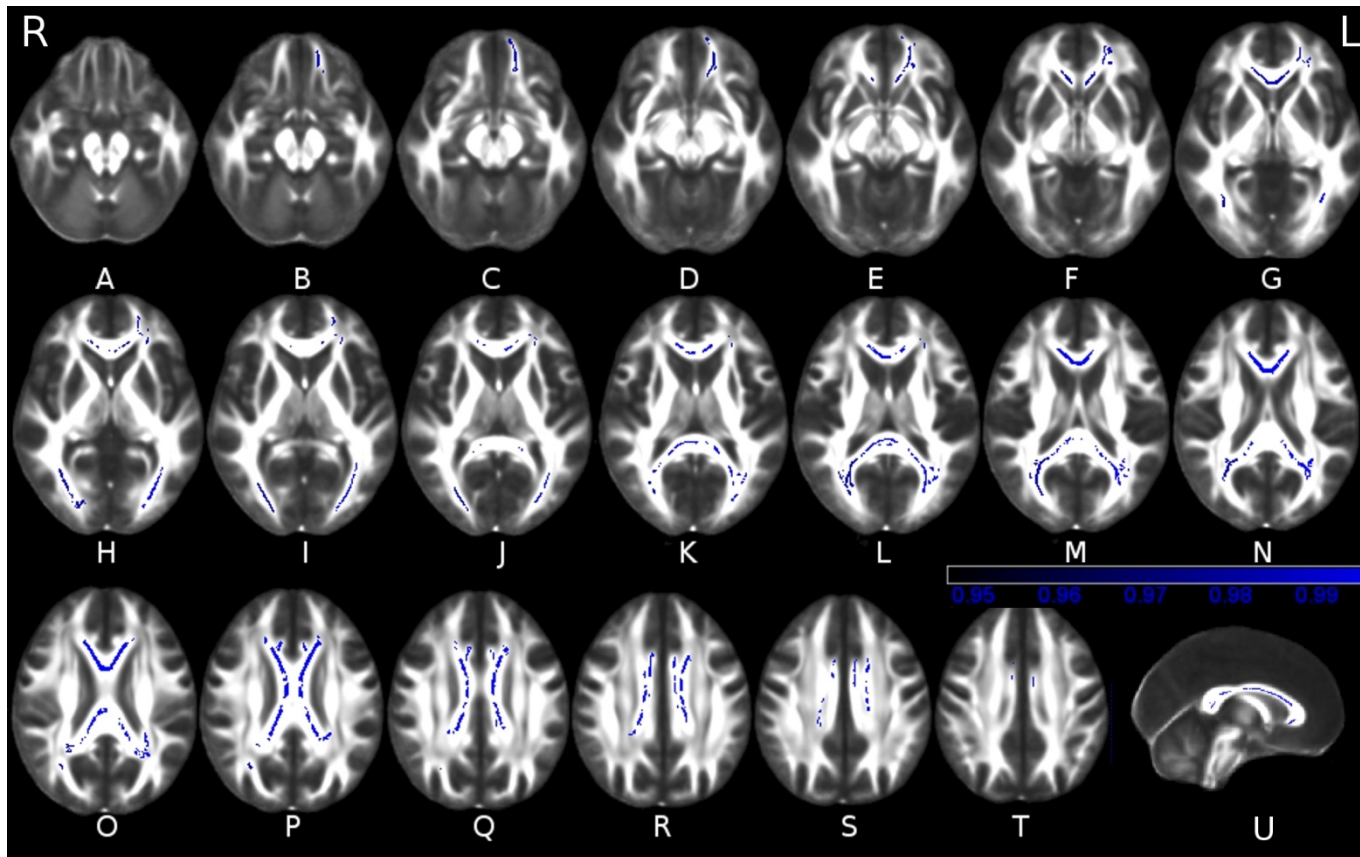

**Supplementary Figure 4 (A-U):** TBSS correlation results in HD gene carriers. Blue shows the areas where FA inversely correlates ( $t > 3$  with  $p < 0.05$  corrected for multiple comparisons) with the motor scale of the UHDRS. Note the predominant location within (head, body and splenium) (U) and beside the corpus callosum (colour bar indicates 1-p values) of the significant clusters.

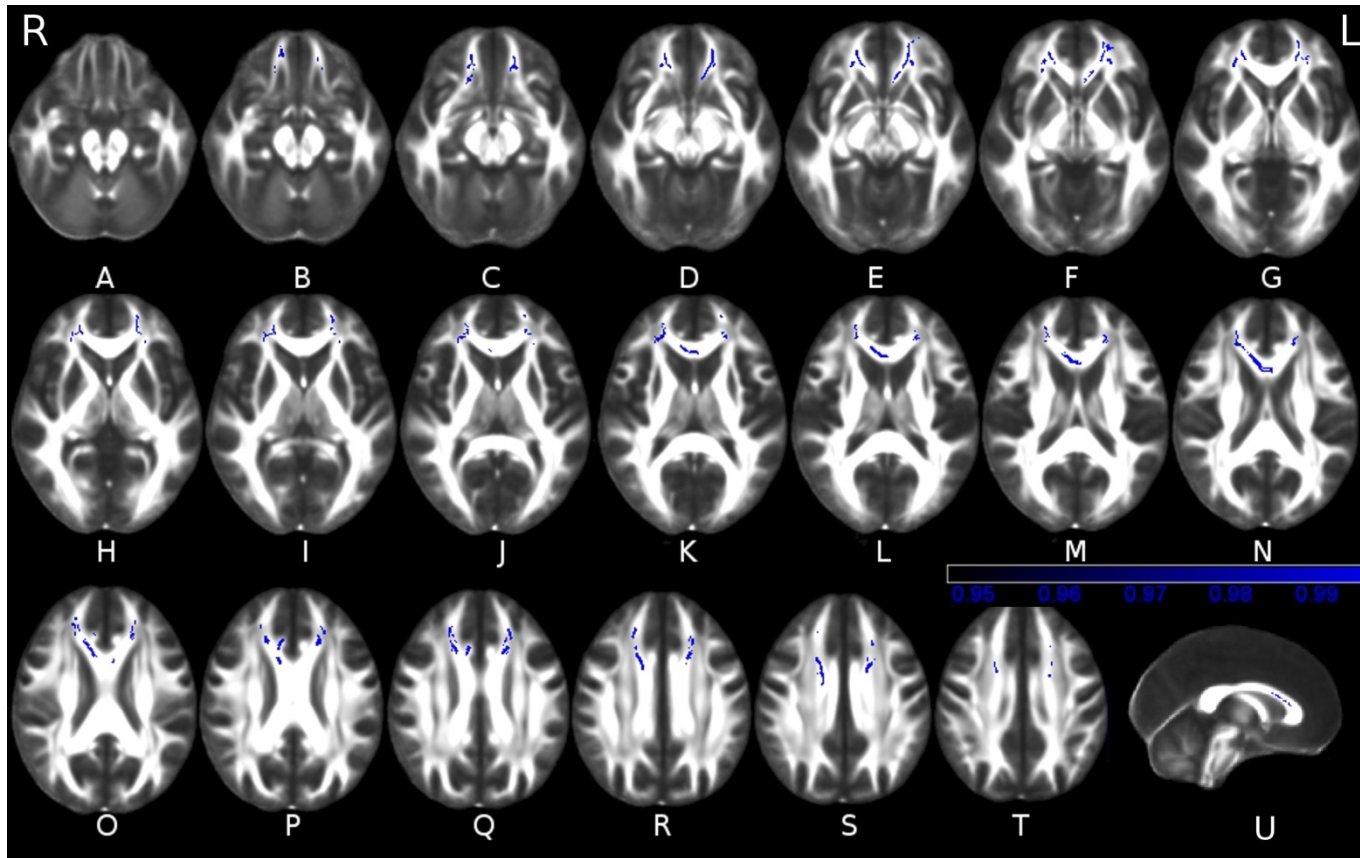

**Supplementary Figure 5 (A-U):** TBSS correlation results in HD gene carriers. Blue shows the areas where FA correlates ( $t > 3$  with  $p < 0.05$  corrected for multiple comparisons) with the Stroop test results. Note the restriction of the areas to the frontal lobes and to the anterior portion of the corpus callosum body (U) (colour bar indicates  $1-p$  values).



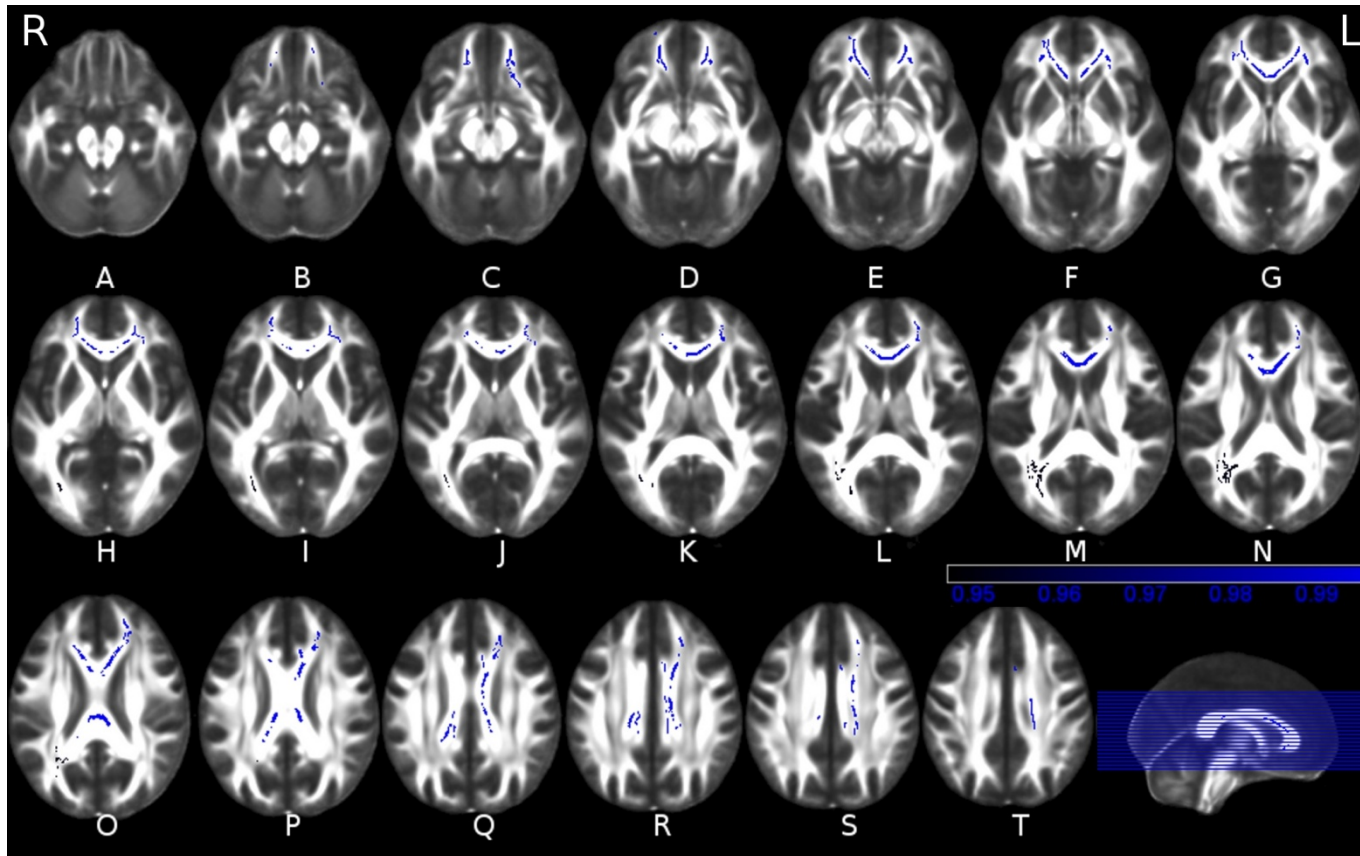

**Supplementary Figure 6 (A-U):** TBSS correlation results in HD gene carriers. Blue shows the areas where FA correlates ( $t > 3$  with  $p < 0.05$  corrected for multiple comparisons) with the individual scores in the Symbol Digit test (colour bar indicates  $1-p$  values). The clusters in the corpus callosum (U) are localized in the anterior and posterior portion of the body and in the head.

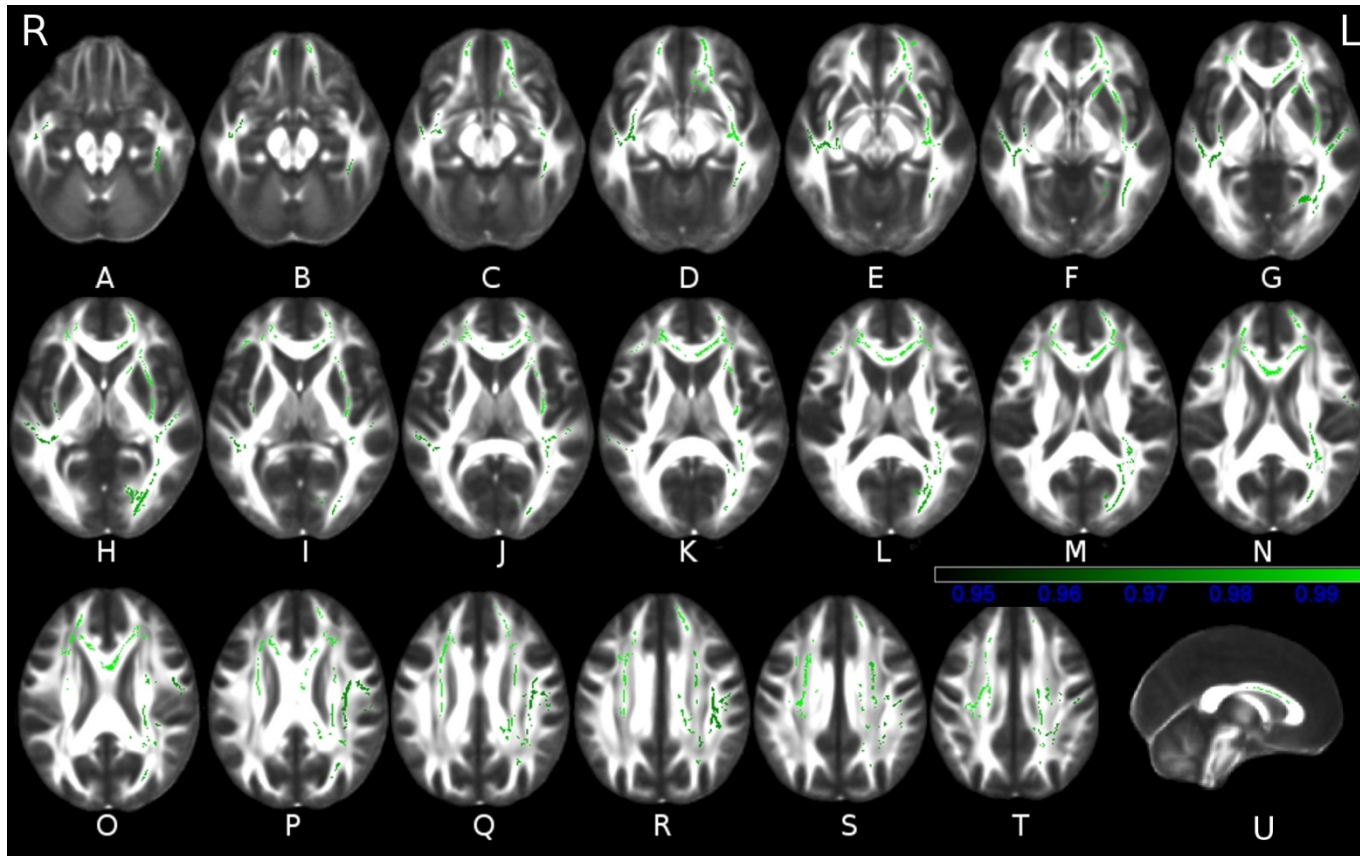

**Supplementary Figure 7 (A-U):** TBSS correlation results in HD gene carriers. Green shows the areas where MD correlates ( $t > 3$  with  $p < 0.05$  corrected for multiple comparisons) with the individual motor score (colour bar indicates 1-p values). The clusters in the corpus callosum (U) are localized in the body.

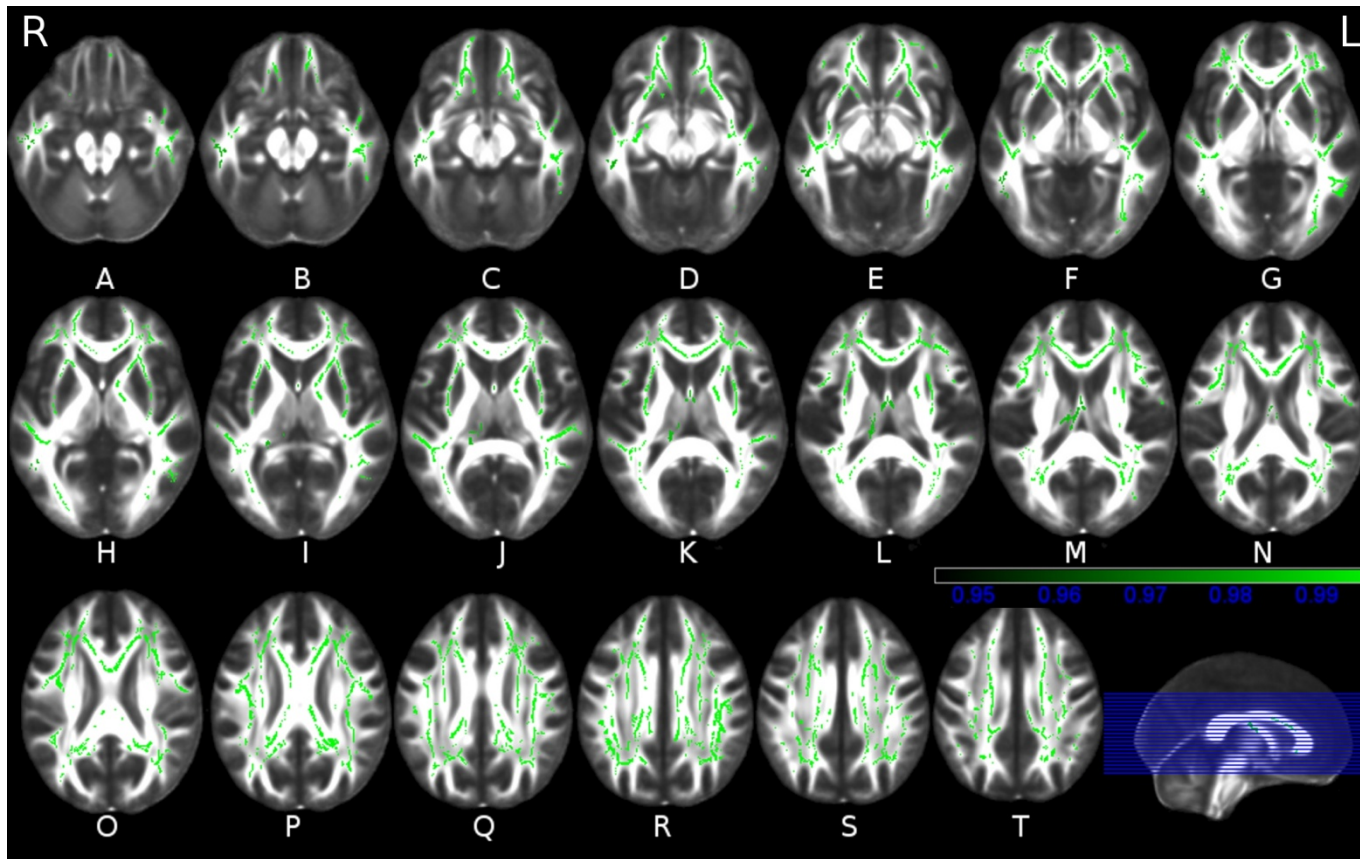

**Supplementary Figure 8 (A-T):** TBSS correlation results in HD gene carriers. Green shows the areas where MD inversely correlates ( $t > 3$  with  $p < 0.05$  corrected for multiple comparisons) with the individual scores in the Verbal Fluency test (colour bar indicates 1-p values).

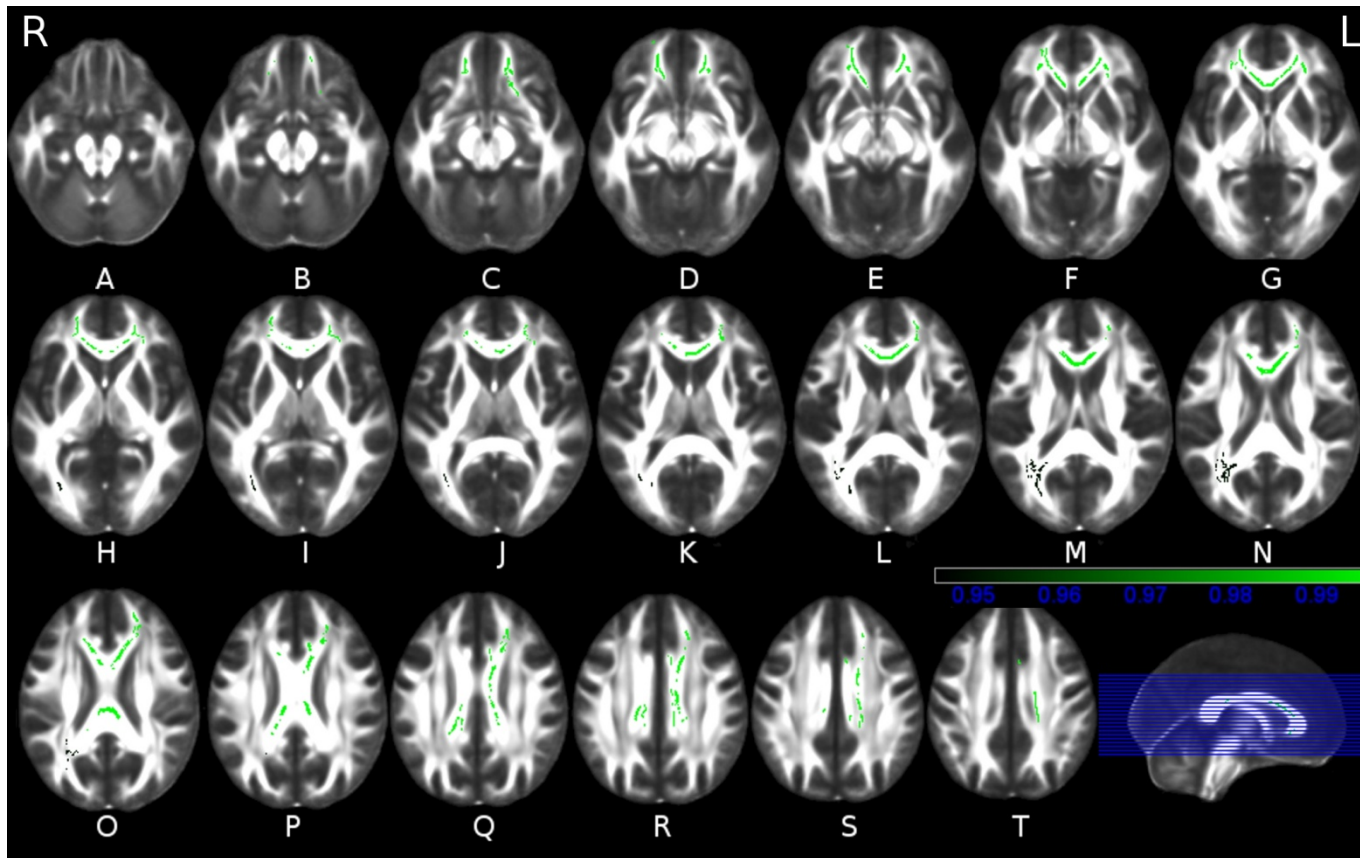

**Supplementary Figure 9 (A-T):** TBSS correlation results in HD gene carriers. Green shows the areas where MD inversely correlates ( $t > 3$  with  $p < 0.05$  corrected for multiple comparisons) with the individual scores in the Symbol Digit test (colour bar indicates 1-p values).
